# Supplementary material
Source: MDPI journal article supplement (https://www.mdpi.com/2624-8549/3/4/99)
Supplement: s1 [file s1]

# Supplementary Materials

## The magnetic response of starphenes

Mesías Orozco-Ic <sup>1,2,\*</sup> and Gabriel Merino <sup>2,\*</sup>

<sup>1</sup> Department of Chemistry, Faculty of Science, University of Helsinki, P.O. Box 55, A. I. Virtasen aukio 1, FIN-00014 Helsinki, Finland  
<sup>2</sup> Departamento de Física Aplicada, Centro de Investigación y de Estudios Avanzados, Unidad Mérida. Km 6 Antigua Carretera a Progreso. Apdo. Postal 73, Cordemex, 97310, Mérida, Yuc., Mexico  
\* Correspondence: mesiasor@ad.helsinki.fi (M.O.-I.); gmerino@cinvestav.mx (G.M.)  
# Dedicated to Professor Riccardo Zanasi on the Occasion of His 70th Birthday

Optimized Cartesian coordinates at CAM-B3LYP-D3(BJ)/def2-TZVP level.

Benzene

|   |              |              |             |
|---|--------------|--------------|-------------|
| C | 0.000000000  | 1.393159000  | 0.000000000 |
| C | 1.206511000  | 0.696580000  | 0.000000000 |
| C | -1.206511000 | 0.696580000  | 0.000000000 |
| C | -1.206511000 | -0.696580000 | 0.000000000 |
| C | 0.000000000  | -1.393159000 | 0.000000000 |
| C | 1.206511000  | -0.696580000 | 0.000000000 |
| H | 0.000000000  | 2.485233000  | 0.000000000 |
| H | 2.152275000  | 1.242617000  | 0.000000000 |
| H | 2.152275000  | -1.242617000 | 0.000000000 |
| H | 0.000000000  | -2.485233000 | 0.000000000 |
| H | -2.152275000 | -1.242617000 | 0.000000000 |
| H | -2.152275000 | 1.242617000  | 0.000000000 |

[4]starphene

|   |              |              |             |
|---|--------------|--------------|-------------|
| C | 0.699011000  | 3.692065000  | 0.000000000 |
| C | -0.699011000 | 3.692065000  | 0.000000000 |
| C | 1.380547000  | 2.492397000  | 0.000000000 |
| C | 0.706097000  | 1.255009000  | 0.000000000 |
| C | -0.706097000 | 1.255009000  | 0.000000000 |
| C | 1.439918000  | -0.016006000 | 0.000000000 |
| C | 0.733821000  | -1.239003000 | 0.000000000 |
| C | -0.733821000 | -1.239003000 | 0.000000000 |
| C | -1.439918000 | -0.016006000 | 0.000000000 |
| C | -1.380547000 | 2.492397000  | 0.000000000 |
| C | -1.468206000 | -2.441787000 | 0.000000000 |
| C | -2.848753000 | -0.050610000 | 0.000000000 |
| C | -3.546928000 | -1.240671000 | 0.000000000 |
| C | -2.847916000 | -2.451394000 | 0.000000000 |
| C | 2.848753000  | -0.050610000 | 0.000000000 |
| C | 3.546928000  | -1.240671000 | 0.000000000 |
| C | 2.847916000  | -2.451394000 | 0.000000000 |
| C | 1.468206000  | -2.441787000 | 0.000000000 |
| H | 2.468443000  | 2.517165000  | 0.000000000 |
| H | -2.468443000 | 2.517165000  | 0.000000000 |

|   |              |              |             |
|---|--------------|--------------|-------------|
| H | -0.945708000 | -3.396317000 | 0.000000000 |
| H | -3.414151000 | 0.879152000  | 0.000000000 |
| H | 3.414151000  | 0.879152000  | 0.000000000 |
| H | 0.945708000  | -3.396317000 | 0.000000000 |
| H | 4.638622000  | -1.231872000 | 0.000000000 |
| H | 3.386143000  | -3.401228000 | 0.000000000 |
| H | -4.638622000 | -1.231872000 | 0.000000000 |
| H | -3.386143000 | -3.401228000 | 0.000000000 |
| H | -1.252479000 | 4.633100000  | 0.000000000 |
| H | 1.252479000  | 4.633100000  | 0.000000000 |

# [7]starphene

|   |              |              |             |
|---|--------------|--------------|-------------|
| C | 0.710434000  | 3.718454000  | 0.000000000 |
| C | -0.710434000 | 3.718454000  | 0.000000000 |
| C | 1.381146000  | 2.480064000  | 0.000000000 |
| C | 0.716523000  | 1.267235000  | 0.000000000 |
| C | -0.716523000 | 1.267235000  | 0.000000000 |
| C | 1.455719000  | -0.013091000 | 0.000000000 |
| C | 0.739196000  | -1.254144000 | 0.000000000 |
| C | -0.739196000 | -1.254144000 | 0.000000000 |
| C | -1.455719000 | -0.013091000 | 0.000000000 |
| C | -1.381146000 | 2.480064000  | 0.000000000 |
| C | -1.457226000 | -2.436140000 | 0.000000000 |
| C | -2.838372000 | -0.043925000 | 0.000000000 |
| C | -3.575493000 | -1.243974000 | 0.000000000 |
| C | -2.865059000 | -2.474481000 | 0.000000000 |
| C | 2.838372000  | -0.043925000 | 0.000000000 |
| C | 3.575493000  | -1.243974000 | 0.000000000 |
| C | 2.865059000  | -2.474481000 | 0.000000000 |
| C | 1.457226000  | -2.436140000 | 0.000000000 |
| H | 2.469531000  | 2.510752000  | 0.000000000 |
| H | -2.469531000 | 2.510752000  | 0.000000000 |
| H | -0.939610000 | -3.394053000 | 0.000000000 |
| H | -3.409141000 | 0.883301000  | 0.000000000 |
| H | 3.409141000  | 0.883301000  | 0.000000000 |
| H | 0.939610000  | -3.394053000 | 0.000000000 |
| C | 3.596727000  | -3.694766000 | 0.000000000 |
| C | 4.998124000  | -1.267474000 | 0.000000000 |
| C | -4.998124000 | -1.267474000 | 0.000000000 |
| C | -3.596727000 | -3.694766000 | 0.000000000 |
| C | 5.675541000  | -2.457374000 | 0.000000000 |
| C | 4.965919000  | -3.686475000 | 0.000000000 |
| H | 5.540125000  | -0.318885000 | 0.000000000 |
| H | 3.046225000  | -4.638447000 | 0.000000000 |
| C | -4.965919000 | -3.686475000 | 0.000000000 |
| C | -5.675541000 | -2.457374000 | 0.000000000 |
| H | -3.046225000 | -4.638447000 | 0.000000000 |
| H | -5.540125000 | -0.318885000 | 0.000000000 |
| C | -1.401398000 | 4.962240000  | 0.000000000 |

|   |              |              |             |
|---|--------------|--------------|-------------|
| C | 1.401398000  | 4.962240000  | 0.000000000 |
| C | 0.709622000  | 6.143849000  | 0.000000000 |
| C | -0.709622000 | 6.143849000  | 0.000000000 |
| H | -2.493900000 | 4.957332000  | 0.000000000 |
| H | 2.493900000  | 4.957332000  | 0.000000000 |
| H | 5.519472000  | -4.627653000 | 0.000000000 |
| H | 6.767401000  | -2.466176000 | 0.000000000 |
| H | 1.247929000  | 7.093829000  | 0.000000000 |
| H | -1.247929000 | 7.093829000  | 0.000000000 |
| H | -6.767401000 | -2.466176000 | 0.000000000 |
| H | -5.519472000 | -4.627653000 | 0.000000000 |

# [10]starphene

|   |              |              |             |
|---|--------------|--------------|-------------|
| C | 0.715284000  | 3.728862000  | 0.000000000 |
| C | -0.715284000 | 3.728862000  | 0.000000000 |
| C | 1.384056000  | 2.476585000  | 0.000000000 |
| C | 0.722712000  | 1.272059000  | 0.000000000 |
| C | -0.722712000 | 1.272059000  | 0.000000000 |
| C | 1.462991000  | -0.010142000 | 0.000000000 |
| C | 0.740279000  | -1.261917000 | 0.000000000 |
| C | -0.740279000 | -1.261917000 | 0.000000000 |
| C | -1.462991000 | -0.010142000 | 0.000000000 |
| C | -1.384056000 | 2.476585000  | 0.000000000 |
| C | -1.452758000 | -2.436920000 | 0.000000000 |
| C | -2.836814000 | -0.039665000 | 0.000000000 |
| C | -3.586931000 | -1.244977000 | 0.000000000 |
| C | -2.871647000 | -2.483885000 | 0.000000000 |
| C | 2.836814000  | -0.039665000 | 0.000000000 |
| C | 3.586931000  | -1.244977000 | 0.000000000 |
| C | 2.871647000  | -2.483885000 | 0.000000000 |
| C | 1.452758000  | -2.436920000 | 0.000000000 |
| H | 2.472255000  | 2.508332000  | 0.000000000 |
| H | -2.472255000 | 2.508332000  | 0.000000000 |
| H | -0.936152000 | -3.395201000 | 0.000000000 |
| H | -3.408406000 | 0.886870000  | 0.000000000 |
| H | 3.408406000  | 0.886870000  | 0.000000000 |
| H | 0.936152000  | -3.395201000 | 0.000000000 |
| C | 3.584872000  | -3.687066000 | 0.000000000 |
| C | 4.985529000  | -1.261058000 | 0.000000000 |
| C | -4.985529000 | -1.261058000 | 0.000000000 |
| C | -3.584872000 | -3.687066000 | 0.000000000 |
| C | 5.699225000  | -2.459962000 | 0.000000000 |
| C | 4.980002000  | -3.705693000 | 0.000000000 |
| C | 7.130631000  | -2.495089000 | 0.000000000 |
| C | 5.726126000  | -4.927763000 | 0.000000000 |
| C | 7.088914000  | -4.917018000 | 0.000000000 |
| C | 7.802720000  | -3.680670000 | 0.000000000 |
| H | 5.531397000  | -0.314196000 | 0.000000000 |
| H | 3.037800000  | -4.633232000 | 0.000000000 |
| H | 5.176868000  | -5.872039000 | 0.000000000 |

|   |              |              |             |
|---|--------------|--------------|-------------|
| H | 7.673769000  | -1.547280000 | 0.000000000 |
| C | -4.980002000 | -3.705693000 | 0.000000000 |
| C | -5.699225000 | -2.459962000 | 0.000000000 |
| C | -7.130631000 | -2.495089000 | 0.000000000 |
| C | -7.802720000 | -3.680670000 | 0.000000000 |
| H | -3.037800000 | -4.633232000 | 0.000000000 |
| H | -5.531397000 | -0.314196000 | 0.000000000 |
| H | -7.673769000 | -1.547280000 | 0.000000000 |
| C | -1.400657000 | 4.948123000  | 0.000000000 |
| C | 1.400657000  | 4.948123000  | 0.000000000 |
| C | 0.719223000  | 6.165655000  | 0.000000000 |
| C | -0.719223000 | 6.165655000  | 0.000000000 |
| C | 1.404505000  | 7.422852000  | 0.000000000 |
| C | -1.404505000 | 7.422852000  | 0.000000000 |
| C | 0.713806000  | 8.597689000  | 0.000000000 |
| C | -0.713806000 | 8.597689000  | 0.000000000 |
| H | -2.493597000 | 4.947428000  | 0.000000000 |
| H | 2.493597000  | 4.947428000  | 0.000000000 |
| H | -2.496901000 | 7.419319000  | 0.000000000 |
| H | 2.496901000  | 7.419319000  | 0.000000000 |
| C | -5.726126000 | -4.927763000 | 0.000000000 |
| C | -7.088914000 | -4.917018000 | 0.000000000 |
| H | -5.176868000 | -5.872039000 | 0.000000000 |
| H | -7.644916000 | -5.856761000 | 0.000000000 |
| H | -8.894562000 | -3.692310000 | 0.000000000 |
| H | 7.644916000  | -5.856761000 | 0.000000000 |
| H | 8.894562000  | -3.692310000 | 0.000000000 |
| H | 1.249646000  | 9.549072000  | 0.000000000 |
| H | -1.249646000 | 9.549072000  | 0.000000000 |

[13]starphene

|   |              |              |             |
|---|--------------|--------------|-------------|
| C | 0.718943000  | 3.734254000  | 0.000000000 |
| C | -0.718943000 | 3.734254000  | 0.000000000 |
| C | 1.385825000  | 2.474918000  | 0.000000000 |
| C | 0.726104000  | 1.274217000  | 0.000000000 |
| C | -0.726104000 | 1.274217000  | 0.000000000 |
| C | 1.466556000  | -0.008284000 | 0.000000000 |
| C | 0.740452000  | -1.265933000 | 0.000000000 |
| C | -0.740452000 | -1.265933000 | 0.000000000 |
| C | -1.466556000 | -0.008284000 | 0.000000000 |
| C | -1.385825000 | 2.474918000  | 0.000000000 |
| C | -1.450430000 | -2.437618000 | 0.000000000 |
| C | -2.836254000 | -0.037300000 | 0.000000000 |
| C | -3.593430000 | -1.244505000 | 0.000000000 |
| C | -2.874488000 | -2.489750000 | 0.000000000 |
| C | 2.836254000  | -0.037300000 | 0.000000000 |
| C | 3.593430000  | -1.244505000 | 0.000000000 |
| C | 2.874488000  | -2.489750000 | 0.000000000 |
| C | 1.450430000  | -2.437618000 | 0.000000000 |
| H | 2.474050000  | 2.506626000  | 0.000000000 |

|   |              |              |             |
|---|--------------|--------------|-------------|
| H | -2.474050000 | 2.506626000  | 0.000000000 |
| H | -0.933777000 | -3.395903000 | 0.000000000 |
| H | -3.407827000 | 0.889277000  | 0.000000000 |
| H | 3.407827000  | 0.889277000  | 0.000000000 |
| H | 0.933777000  | -3.395903000 | 0.000000000 |
| C | 3.578045000  | -3.686352000 | 0.000000000 |
| C | 4.981497000  | -1.255502000 | 0.000000000 |
| C | -4.981497000 | -1.255502000 | 0.000000000 |
| C | -3.578045000 | -3.686352000 | 0.000000000 |
| C | 5.707751000  | -2.461639000 | 0.000000000 |
| C | 4.985718000  | -3.712238000 | 0.000000000 |
| C | 7.116271000  | -2.489863000 | 0.000000000 |
| C | 5.714420000  | -4.917940000 | 0.000000000 |
| C | 7.101019000  | -4.933676000 | 0.000000000 |
| C | 7.823198000  | -3.682825000 | 0.000000000 |
| C | 9.258958000  | -3.721162000 | 0.000000000 |
| C | 7.852100000  | -6.157912000 | 0.000000000 |
| C | 9.927800000  | -4.905059000 | 0.000000000 |
| C | 9.211805000  | -6.145198000 | 0.000000000 |
| H | 5.527227000  | -0.308663000 | 0.000000000 |
| H | 3.030924000  | -4.632387000 | 0.000000000 |
| H | 5.168925000  | -5.864930000 | 0.000000000 |
| H | 7.663641000  | -1.543956000 | 0.000000000 |
| H | 9.802958000  | -2.773886000 | 0.000000000 |
| H | 7.303735000  | -7.102668000 | 0.000000000 |
| C | -4.985718000 | -3.712238000 | 0.000000000 |
| C | -5.707751000 | -2.461639000 | 0.000000000 |
| C | -7.116271000 | -2.489863000 | 0.000000000 |
| C | -7.823198000 | -3.682825000 | 0.000000000 |
| H | -3.030924000 | -4.632387000 | 0.000000000 |
| H | -5.527227000 | -0.308663000 | 0.000000000 |
| H | -7.663641000 | -1.543956000 | 0.000000000 |
| C | -1.403452000 | 4.941854000  | 0.000000000 |
| C | 1.403452000  | 4.941854000  | 0.000000000 |
| C | 0.722034000  | 6.173877000  | 0.000000000 |
| C | -0.722034000 | 6.173877000  | 0.000000000 |
| C | 1.401851000  | 7.407803000  | 0.000000000 |
| C | -1.401851000 | 7.407803000  | 0.000000000 |
| C | 0.722179000  | 8.616501000  | 0.000000000 |
| C | -0.722179000 | 8.616501000  | 0.000000000 |
| C | -1.406858000 | 9.879074000  | 0.000000000 |
| H | -2.496303000 | 4.941051000  | 0.000000000 |
| H | 2.496303000  | 4.941051000  | 0.000000000 |
| H | -2.494716000 | 7.408886000  | 0.000000000 |
| H | 2.494716000  | 7.408886000  | 0.000000000 |
| H | -2.499223000 | 9.876554000  | 0.000000000 |
| C | 1.406858000  | 9.879074000  | 0.000000000 |
| C | -0.715995000 | 11.050256000 | 0.000000000 |
| C | 0.715995000  | 11.050256000 | 0.000000000 |
| H | 2.499223000  | 9.876554000  | 0.000000000 |
| C | -5.714420000 | -4.917940000 | 0.000000000 |

|   |               |              |             |
|---|---------------|--------------|-------------|
| C | -7.101019000  | -4.933676000 | 0.000000000 |
| C | -7.852100000  | -6.157912000 | 0.000000000 |
| C | -9.258958000  | -3.721162000 | 0.000000000 |
| C | -9.211805000  | -6.145198000 | 0.000000000 |
| C | -9.927800000  | -4.905059000 | 0.000000000 |
| H | -5.168925000  | -5.864930000 | 0.000000000 |
| H | -7.303735000  | -7.102668000 | 0.000000000 |
| H | -9.802958000  | -2.773886000 | 0.000000000 |
| H | -11.019753000 | -4.917965000 | 0.000000000 |
| H | -9.768960000  | -7.084404000 | 0.000000000 |
| H | -1.250794000  | 12.002369000 | 0.000000000 |
| H | 1.250794000   | 12.002369000 | 0.000000000 |
| H | 11.019753000  | -4.917965000 | 0.000000000 |
| H | 9.768960000   | -7.084404000 | 0.000000000 |

[16]starphene

|   |              |              |             |
|---|--------------|--------------|-------------|
| C | 0.720940000  | 3.736597000  | 0.000000000 |
| C | -0.720940000 | 3.736597000  | 0.000000000 |
| C | 1.386868000  | 2.474275000  | 0.000000000 |
| C | 0.727742000  | 1.275082000  | 0.000000000 |
| C | -0.727742000 | 1.275082000  | 0.000000000 |
| C | 1.468124000  | -0.007298000 | 0.000000000 |
| C | 0.740383000  | -1.267784000 | 0.000000000 |
| C | -0.740383000 | -1.267784000 | 0.000000000 |
| C | -1.468124000 | -0.007298000 | 0.000000000 |
| C | -1.386868000 | 2.474275000  | 0.000000000 |
| C | -1.449351000 | -2.438201000 | 0.000000000 |
| C | -2.836219000 | -0.036075000 | 0.000000000 |
| C | -3.596458000 | -1.243947000 | 0.000000000 |
| C | -2.875518000 | -2.492651000 | 0.000000000 |
| C | 2.836219000  | -0.036075000 | 0.000000000 |
| C | 3.596458000  | -1.243947000 | 0.000000000 |
| C | 2.875518000  | -2.492651000 | 0.000000000 |
| C | 1.449351000  | -2.438201000 | 0.000000000 |
| H | 2.475067000  | 2.505789000  | 0.000000000 |
| H | -2.475067000 | 2.505789000  | 0.000000000 |
| H | -0.932543000 | -3.396366000 | 0.000000000 |
| H | -3.407611000 | 0.890577000  | 0.000000000 |
| H | 3.407611000  | 0.890577000  | 0.000000000 |
| H | 0.932543000  | -3.396366000 | 0.000000000 |
| C | 3.574574000  | -3.686459000 | 0.000000000 |
| C | 4.979854000  | -1.252443000 | 0.000000000 |
| C | -4.979854000 | -1.252443000 | 0.000000000 |
| C | -3.574574000 | -3.686459000 | 0.000000000 |
| C | 5.712824000  | -2.461550000 | 0.000000000 |
| C | 4.988176000  | -3.716676000 | 0.000000000 |
| C | 7.111593000  | -2.484801000 | 0.000000000 |
| C | 5.707697000  | -4.916420000 | 0.000000000 |
| C | 7.105642000  | -4.938384000 | 0.000000000 |
| C | 7.829587000  | -3.684474000 | 0.000000000 |

|   |              |              |             |
|---|--------------|--------------|-------------|
| C | 9.244502000  | -3.716381000 | 0.000000000 |
| C | 7.840731000  | -6.147783000 | 0.000000000 |
| C | 9.946770000  | -4.906169000 | 0.000000000 |
| C | 9.222252000  | -6.161071000 | 0.000000000 |
| C | 11.385091000 | -4.947051000 | 0.000000000 |
| C | 9.976817000  | -7.386252000 | 0.000000000 |
| C | 11.334594000 | -7.372853000 | 0.000000000 |
| C | 12.052375000 | -6.129620000 | 0.000000000 |
| H | 5.524697000  | -0.305143000 | 0.000000000 |
| H | 3.026610000  | -4.631956000 | 0.000000000 |
| H | 5.161635000  | -5.862925000 | 0.000000000 |
| H | 7.658259000  | -1.538645000 | 0.000000000 |
| H | 9.791552000  | -2.770319000 | 0.000000000 |
| H | 7.294943000  | -7.094573000 | 0.000000000 |
| H | 11.929311000 | -3.999835000 | 0.000000000 |
| H | 9.428615000  | -8.331169000 | 0.000000000 |
| C | -4.988176000 | -3.716676000 | 0.000000000 |
| C | -5.712824000 | -2.461550000 | 0.000000000 |
| C | -7.111593000 | -2.484801000 | 0.000000000 |
| C | -7.829587000 | -3.684474000 | 0.000000000 |
| H | -3.026610000 | -4.631956000 | 0.000000000 |
| H | -5.524697000 | -0.305143000 | 0.000000000 |
| H | -7.658259000 | -1.538645000 | 0.000000000 |
| C | -1.405280000 | 4.938902000  | 0.000000000 |
| C | 1.405280000  | 4.938902000  | 0.000000000 |
| C | 0.724648000  | 6.178226000  | 0.000000000 |
| C | -0.724648000 | 6.178226000  | 0.000000000 |
| C | 1.403896000  | 7.401221000  | 0.000000000 |
| C | -1.403896000 | 7.401221000  | 0.000000000 |
| C | 0.723945000  | 8.622858000  | 0.000000000 |
| C | -0.723945000 | 8.622858000  | 0.000000000 |
| C | -1.403771000 | 9.864164000  | 0.000000000 |
| H | -2.498087000 | 4.937100000  | 0.000000000 |
| H | 2.498087000  | 4.937100000  | 0.000000000 |
| H | -2.496624000 | 7.401570000  | 0.000000000 |
| H | 2.496624000  | 7.401570000  | 0.000000000 |
| H | -2.496609000 | 9.864892000  | 0.000000000 |
| C | 1.403771000  | 9.864164000  | 0.000000000 |
| C | -0.724518000 | 11.067240000 | 0.000000000 |
| C | 0.724518000  | 11.067240000 | 0.000000000 |
| H | 2.496609000  | 9.864892000  | 0.000000000 |
| C | 1.408274000  | 12.333303000 | 0.000000000 |
| C | -1.408274000 | 12.333303000 | 0.000000000 |
| C | 0.717781000  | 13.502473000 | 0.000000000 |
| C | -0.717781000 | 13.502473000 | 0.000000000 |
| H | 2.500697000  | 12.331004000 | 0.000000000 |
| H | 1.251223000  | 14.455211000 | 0.000000000 |
| H | -1.251223000 | 14.455211000 | 0.000000000 |
| H | -2.500697000 | 12.331004000 | 0.000000000 |
| C | -5.707697000 | -4.916420000 | 0.000000000 |
| C | -7.105642000 | -4.938384000 | 0.000000000 |

|   |               |              |             |
|---|---------------|--------------|-------------|
| C | -7.840731000  | -6.147783000 | 0.000000000 |
| C | -9.244502000  | -3.716381000 | 0.000000000 |
| C | -9.222252000  | -6.161071000 | 0.000000000 |
| C | -9.946770000  | -4.906169000 | 0.000000000 |
| C | -11.385091000 | -4.947051000 | 0.000000000 |
| C | -9.976817000  | -7.386252000 | 0.000000000 |
| C | -11.334594000 | -7.372853000 | 0.000000000 |
| C | -12.052375000 | -6.129620000 | 0.000000000 |
| H | -5.161635000  | -5.862925000 | 0.000000000 |
| H | -7.294943000  | -7.094573000 | 0.000000000 |
| H | -9.791552000  | -2.770319000 | 0.000000000 |
| H | -11.929311000 | -3.999835000 | 0.000000000 |
| H | -9.428615000  | -8.331169000 | 0.000000000 |
| H | -11.892969000 | -8.311197000 | 0.000000000 |
| H | -13.144192000 | -6.144015000 | 0.000000000 |
| H | 13.144192000  | -6.144015000 | 0.000000000 |
| H | 11.892969000  | -8.311197000 | 0.000000000 |
